# Supplementary material
Source: MDPI journal article supplement (https://www.mdpi.com/1424-8247/15/12/1456)

**Supplementary material online**  
**Content**

- Figure S1. Mirror plot for the propensity scores distribution balance between the two groups (both prior and after matching) after multiple imputation. 0=hydroxychloroquine and 1=Favipravir.
- Figure S2. Love's plot for the covariate balance between the two groups (prior and after matching) after multiple imputation.

**Figure S1.** Mirror plot for the propensity scores distribution balance between the two groups (both prior and after matching) after multiple imputation. 0=hydroxychloroquine and 1=Favipravir.

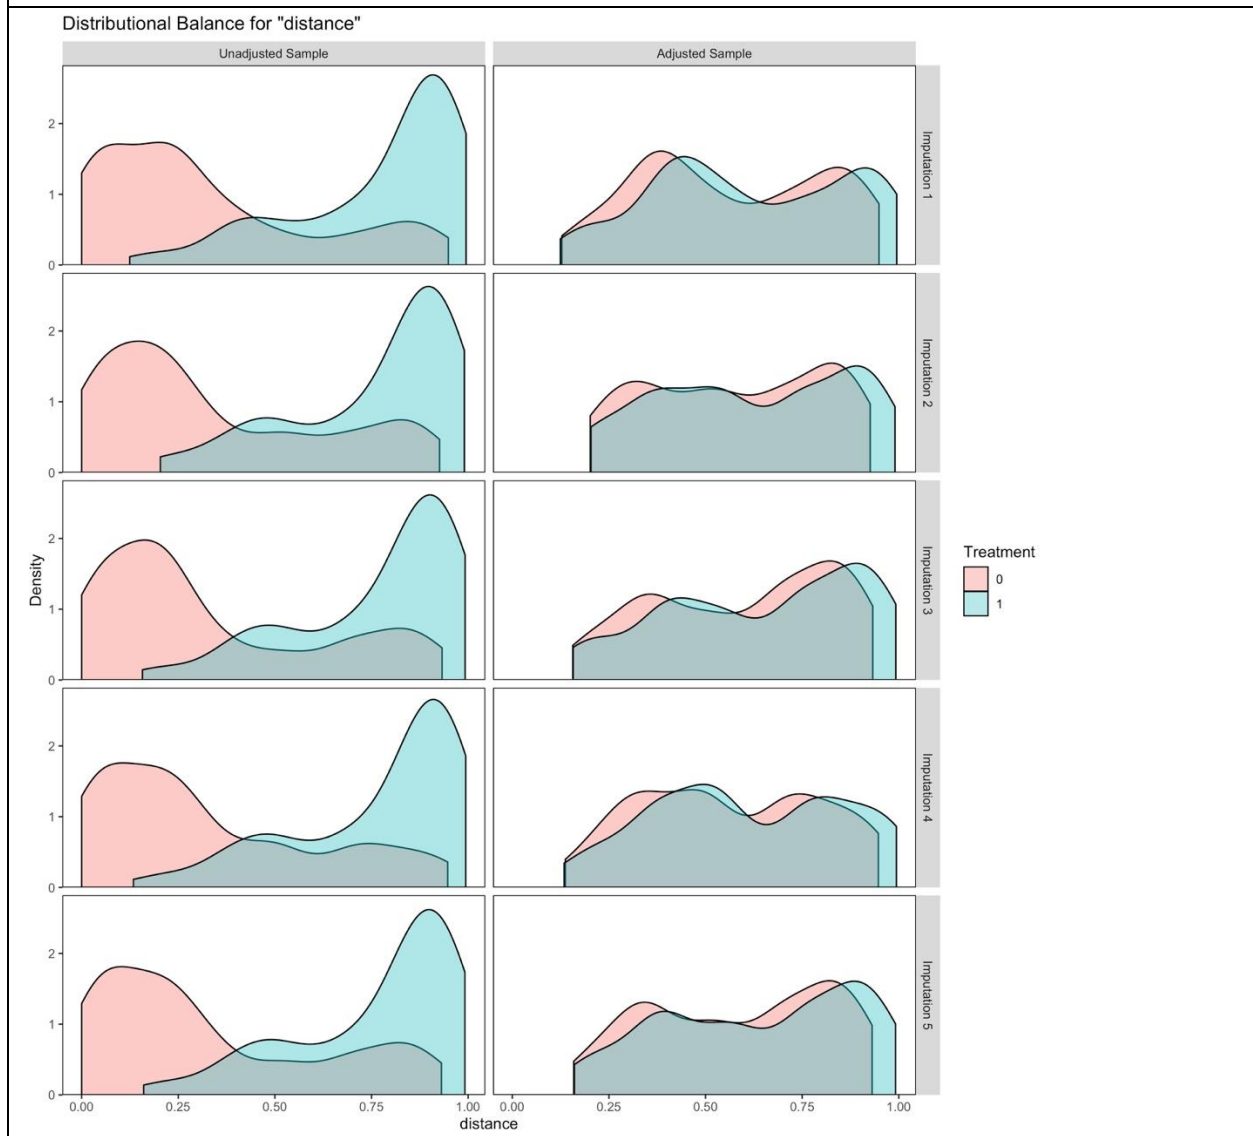

Figure S2. Love's plot for the covariate balance between the two groups (prior and after matching) after multiple imputation.

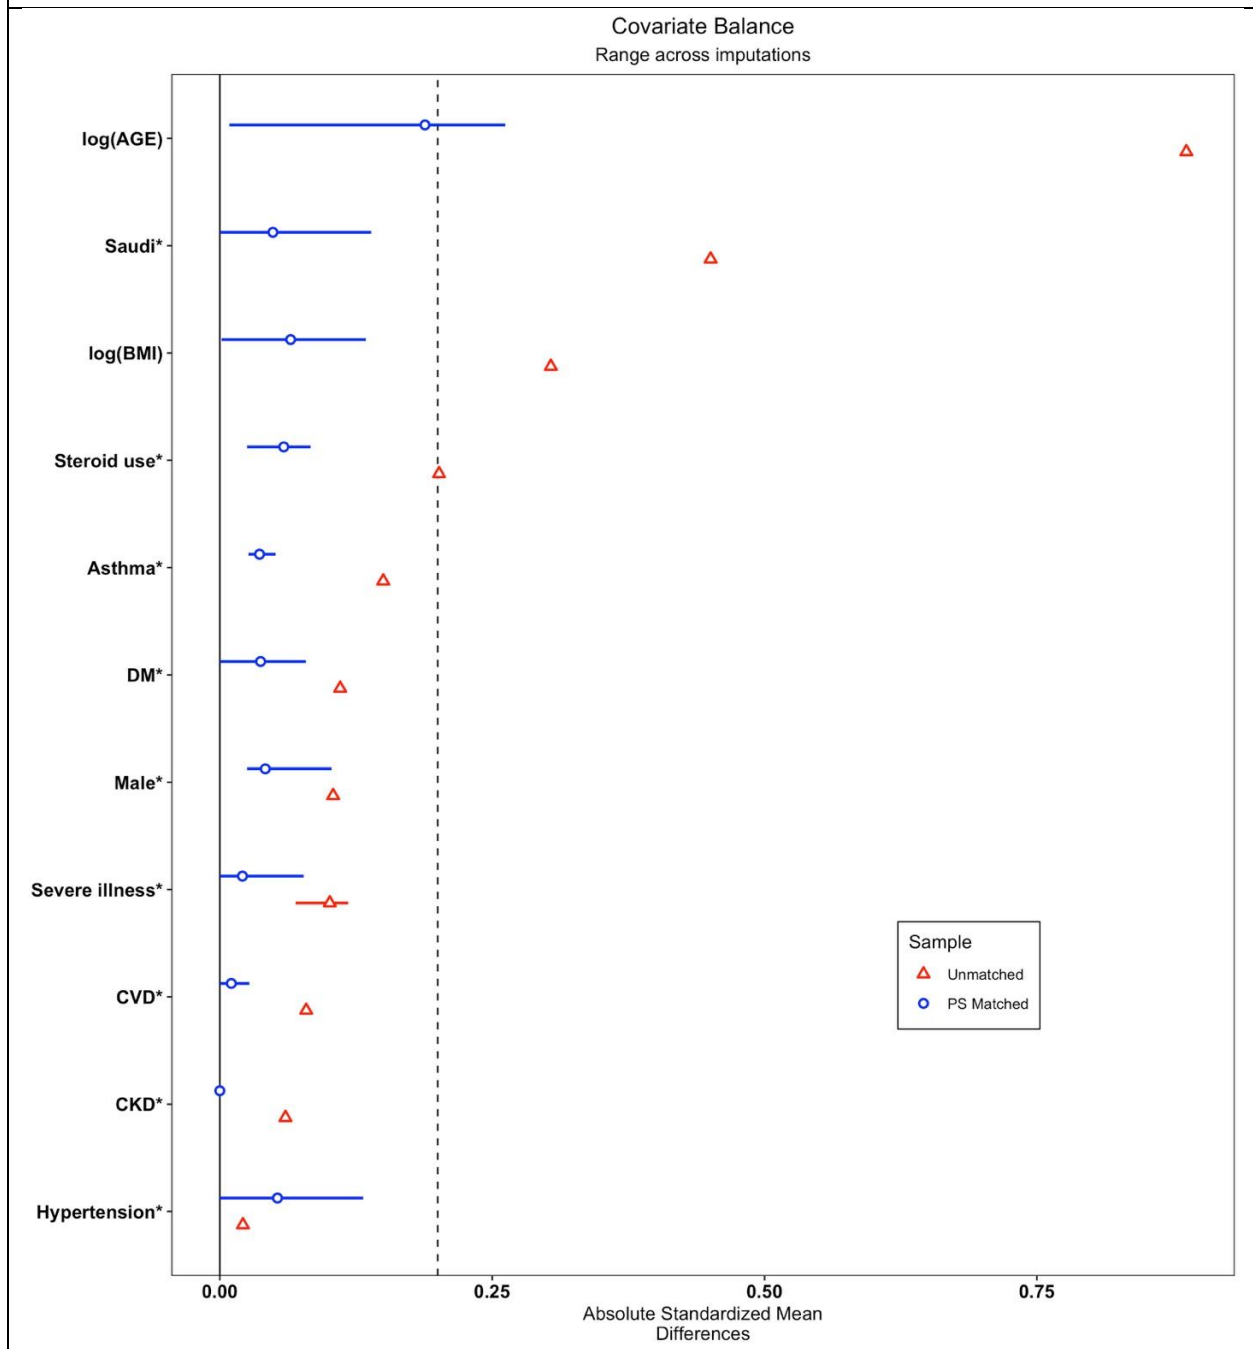

Supplement: s1 [file s1]
